# Supplementary material
Source: PubMed Central journal article supplement (PMC4558384)
Supplement: NIHMS695118-supplement-Suppl.pdf [file NIHMS695118-supplement-Suppl.pdf]

**Supplementary Table. Assessment of quality of studies assessing potential risk factors for posttraumatic stress disorder symptoms following solid organ transplantation**

| <b>Study</b>                       | <b>Consecutive transplant patients</b> | <b>Major losses to follow-up (% lost)<sup>a</sup></b> | <b>Descriptions of participants lost to follow-up</b> | <b>Statistical comparisons of participants lost to follow-up</b> | <b>Adjustment for confounding in analyses of potential risk factors for PTSD</b> |
|------------------------------------|----------------------------------------|-------------------------------------------------------|-------------------------------------------------------|------------------------------------------------------------------|----------------------------------------------------------------------------------|
| Stukas et al. 1999 [18]            | Yes                                    | Yes (13)                                              | Yes                                                   | Yes                                                              | Yes                                                                              |
| Dew et al. 2001a [19]              | Yes                                    | Yes (29)                                              | Yes                                                   | Yes                                                              | N/A                                                                              |
| Dew et al. 2012 [21]               | Yes                                    | Yes (21)                                              | Yes                                                   | Yes                                                              | Yes                                                                              |
| Fukunishi et al. 2002 [22]         | No                                     | No (1)                                                | No                                                    | N/A                                                              | No                                                                               |
| Fukunishi et al. 2001 [23]         | No                                     | -                                                     | -                                                     | -                                                                | No                                                                               |
| Possemato et al. 2009 [24]         | No                                     | N/A                                                   | N/A                                                   | N/A                                                              | No                                                                               |
| Cohen et al. 2014 [25]             | No                                     | No (0)                                                | N/A                                                   | N/A                                                              | No                                                                               |
| Jin et al. 2012 [26]               | No                                     | N/A                                                   | N/A                                                   | N/A                                                              | Yes                                                                              |
| Guimaro et al. 2011 [27]           | No                                     | N/A                                                   | N/A                                                   | N/A                                                              | No                                                                               |
| Possemato et al. 2010 [28]         | No                                     | Yes (13)                                              | Yes                                                   | Yes                                                              | Yes                                                                              |
| Baranyi et al. 2013 [29]           | Yes                                    | No (2)                                                | No                                                    | Yes                                                              | Yes                                                                              |
| Gries et al. 2013 [30]             | No                                     | N/A                                                   | N/A                                                   | N/A                                                              | Yes                                                                              |
| Favaro et al. 2011 [33]            | No                                     | -                                                     | -                                                     | -                                                                | No                                                                               |
| Rothenhäusler et al. 2002 [34]     | Yes                                    | No (7)                                                | No                                                    | Yes                                                              | No                                                                               |
| Bunzel et al. 2007 [35], 2008 [36] | No                                     | N/A                                                   | N/A                                                   | N/A                                                              | No                                                                               |
| Bunzel et al. 2005 [37]            | No                                     | N/A                                                   | N/A                                                   | N/A                                                              | No                                                                               |
| <b>Total/number of studies</b>     | <b>5/21 (38%)</b>                      | <b>4/7 (57%)</b>                                      | <b>4/7 (57%)</b>                                      | <b>6/6 (100%)</b>                                                | <b>6/16 (37%)</b>                                                                |

Abbreviations (in alphabetical order): N/A = not-applicable; PTSD = posttraumatic stress disorder; - = not reported.

<sup>a</sup> Defined as loss of > 10% of study participants by first post-transplant PTSD symptom assessment.

## **Supplementary Appendix A. Search strategies**

### PubMed

(mental disorders[MeSH Terms] OR depress\*[Text Word] OR anxi\*[Text Word] OR stress[Text Word]) AND (transplants[MeSH Terms] OR transplantation[MeSH Terms]) AND English[Language] NOT review[pt]

### PsycInfo

((DE mental disorders) OR (TX “depress” OR “stress” OR “anxi\*”)) AND ((DE transplants OR transplantation)) AND (LA English) NOT (PZ Review))

### CINAHL Plus

(MH(mental disorders, chronic OR neurotic disorders) OR TX (“depress” OR “stress” OR “anxi\*”)) AND (MH(transplants OR transplantation)) AND LA(English)

### Cochrane Library

(mental disorders(MeSH) OR depress\* OR stress OR anxi\*) AND (transplants(MeSH) OR transplantation(MeSH))

## **Supplementary Appendix B. Journals whose online contents were searched**

*American Journal of Psychiatry*  
*American Journal of Transplantation*  
*Annals of Transplantation*  
*British Journal of Psychiatry*  
*Clinical Transplantation*  
*General Hospital Psychiatry*  
*Liver Transplantation*  
*JAMA Psychiatry (Archives of General Psychiatry)*  
*Journal of Heart and Lung Transplantation*  
*Journal of Psychosomatic Research*  
*Nephrology Dialysis Transplantation*  
*Psychological Medicine*  
*Psychosomatic Medicine*  
*Psychosomatics*  
*Psychotherapy and Psychosomatics*  
*Transplantation*  
*Transplant International*  
*Transplantation Proceedings*

## **Supplementary Appendix C. Data abstraction tool**

### **POST-TRANSPLANT PSYCHIATRIC OUTCOMES REVIEW DATA ABSTRACTION FORM**

**Study Title: Authors:**

**Journal:**

**Country conducted:**

**Study Type** (e.g., prospective cohort, cross-sectional):

**N enrolled:**

**Follow-up period (Months):**

**Inclusion Criteria:**

**Exclusion Criteria:**

**Consecutive Transplant Admissions (Y/N):**

**Sex:**

**Age (Mean, SD):**

**Race/Ethnicity:**

**Education:**

**Marital/Partner Status:**

**Medical Comorbidity** (e.g., Charlson score [Mean, SD], Elixhauser or other list of comorbid medical diagnoses):

**Pre-Transplant Psychiatric/Substance Abuse Prevalence (N, %)**

Depression:

Anxiety (includes PTSD and other anxiety disorders):

Bipolar disorder:

Schizophrenia:

Other axis I:

Alcohol abuse/dependence:

Drug abuse/dependence:

**Method of Pre-Transplant Psychiatric/Substance Abuse Ascertainment:**

**Pre-Transplant Cognitive Function**

Cognitive impairment diagnosis (e.g., dementia, delirium, encephalopathy):

Screening measure (e.g., MMSE):

Neuropsychological testing:

**Pre-Transplant ADL/IADL Impairments:**

**Pre-Transplant HRQOL:**

SF-36

PCS:

MCS:

PF:

RP:

BP:

GH:

V:

SF:

RE:

MH:

SIP

Physical Component Score:

Psychosocial Component Score:

EQ-5D:

**Time on Transplant Wait List (Years, Months, Days; Mean, SD):**

**Etiology of organ failure (N, %):**

**Hospital LOS (Mean, SD OR Median, IQR, Absolute Range):**

**ICU LOS (Mean, SD OR Median, IQR, Absolute Range):**

**Duration of Mechanical Ventilation (Mean, SD OR Median, IQR, Absolute Range):**

ECMO:

**Delirium (How assessed; N & Prevalence):**

**In-hospital benzodiazepines (dose and duration):**

**In-hospital opioids (dose and duration):**

**Psychiatry consult (Y/N):**

**Other In-Hospital Transplant-Related Clinical Characteristics:**

**Anti-Rejection Regimen (Duration and dose)**

Corticosteroids:

Tacrolimus (FK506):

Sirolimus (Rapamycin):

Other:

**Loss to follow-up (N[%]):**

**Description of patients lost to follow-up:**

**Statistical comparison of patients lost to follow-up:**

**Post-Transplant Psychiatry Morbidity**

Depression (Method assessed/N(%)):

General anxiety symptoms (Method assessed/N(%)):

PTSD/ASD (Method assessed/N(%)):

Other:

**Post-Transplant Cognitive Function**

Cognitive impairment diagnosis (e.g., dementia, delirium, encephalopathy):

Screening measure (e.g., MMSE):

Neuropsychological testing:

**Post-Transplant ADL/IADL Impairments:**

**Post-Transplant HRQOL:**

SF-36

PCS:

MCS:

PF:

RP:

BP:

GH:

V:

SF:

RE:

MH:

SIP

Physical Component Score:

Psychosocial Component Score:

EQ-5D:

**Post-Transplant Mortality (N/%):**

**Post-Transplant Organ Rejection (N/%):**

**Post-Transplant Medication Non-Compliance:**

**Other Post-Transplant Outcomes:**

**Statistical Analysis Methods**

Analytic methods:

Adjustment for confounding:

**Risk Factors for Post-Transplant Psych Outcomes (Point estimate, P value):**
